# Supplementary material
Source: PubMed Central journal article supplement (PMC7246134)
Supplement: NIHMS1546613-supplement-1.pdf [file NIHMS1546613-supplement-1.pdf]

Supplement 1: Hair dye and straightener exposure and all breast cancer incidence by menopausal status, Sister Study 2003-2009.

|                                                        | Premenopausal Breast Cancer |        |                      | Postmenopausal Breast Cancer |        |                      |
|--------------------------------------------------------|-----------------------------|--------|----------------------|------------------------------|--------|----------------------|
|                                                        | Person-Years                | Events | Adjusted HR (95% CI) | Person-Years                 | Events | Adjusted HR (95% CI) |
|                                                        |                             | 519    |                      |                              | 2,270  |                      |
| <b>Permanent hair dye</b>                              |                             |        |                      |                              |        |                      |
| <b>Personal use in the 12 months before enrollment</b> |                             |        |                      |                              |        |                      |
| No use†                                                | 32,593                      | 199    | Ref                  | 140,084                      | 1,035  | Ref                  |
| Any use                                                | 46,652                      | 320    | 1.12 (0.94,1.34)     | 165,519                      | 1,234  | 1.08 (0.99,1.18)     |
| <4 times per year                                      | 24,504                      | 164    | 1.14 (0.92,1.40)     | 65,030                       | 467    | 1.06 (0.95,1.19)     |
| Every 5-8 weeks, 1+ per month                          | 22,148                      | 156    | 1.11 (0.90,1.37)     | 100,489                      | 767    | 1.09 (0.99,1.20)     |
|                                                        |                             |        | <i>p for trend</i>   |                              |        | 0.3                  |
| <b>Dye color</b>                                       |                             |        |                      |                              |        |                      |
| None                                                   | 32,593                      | 199    | Ref                  | 140,084                      | 1,035  | Ref                  |
| Light colors only                                      | 17,697                      | 142    | 1.30 (1.04, 1.62)    | 74,746                       | 570    | 1.08 (0.98, 1.20)    |
| Dark colors only                                       | 22,094                      | 149    | 1.11 (0.89, 1.37)    | 72,375                       | 530    | 1.07 (0.67, 1.20)    |
| Light and dark colors                                  | 6,332                       | 27     | 0.70 (0.47, 1.05)    | 16,584                       | 117    | 1.06 (0.88, 1.29)    |
| <b>Years of personal use</b>                           |                             |        |                      |                              |        |                      |
| None                                                   | 27,578                      | 169    | Ref                  | 106,988                      | 795    | Ref                  |
| < 5                                                    | 18,257                      | 126    | 1.17 (0.93,1.47)     | 45,410                       | 331    | 1.05 (0.92,1.19)     |
| 5 or more                                              | 32,748                      | 220    | 1.09 (0.89,1.34)     | 148,770                      | 1,116  | 1.04 (0.95,1.14)     |
| <b>Applied to others</b>                               |                             |        |                      |                              |        |                      |
| No use†                                                | 71,136                      | 480    | Ref                  | 285,315                      | 2,121  | Ref                  |
| Any use                                                | 8,108                       | 39     | 0.76 (0.54,1.06)     | 20,288                       | 148    | 1.08 (0.91,1.28)     |
| <4 times per year                                      | 7,202                       | 31     | 0.68 (0.47,0.99)     | 16,667                       | 128    | 1.15 (0.96,1.38)     |
| Every 5-8 weeks, 1+ per month                          | 906                         | 8      | 1.32 (0.65,2.68)     | 3,621                        | 20     | 0.78 (0.50,1.21)     |
|                                                        |                             |        | <i>p for trend</i>   |                              |        | 0.3                  |
| <b>Semi-permanent dye</b>                              |                             |        |                      |                              |        |                      |
| <b>Personal use in the 12 months before enrollment</b> |                             |        |                      |                              |        |                      |
| No use†                                                | 62,323                      | 413    | Ref                  | 251,664                      | 1,895  | Ref                  |
| Any use                                                | 16,922                      | 106    | 0.96 (0.77,1.19)     | 53,939                       | 374    | 0.96 (0.86,1.07)     |
| <4 times per year                                      | 11,989                      | 75     | 0.97 (0.76,1.24)     | 30,770                       | 218    | 1.00 (0.87,1.15)     |
| Every 5-8 weeks, 1+ per month                          | 4,828                       | 31     | 0.93 (0.64, 1.34)    | 23,169                       | 156    | 0.91 (0.77,1.07)     |
|                                                        |                             |        | <i>p for trend</i>   |                              |        | 0.7                  |
| <b>Dye color</b>                                       |                             |        |                      |                              |        |                      |
| None                                                   | 62,323                      | 413    | Ref                  | 251,664                      | 1,895  | Ref                  |
| Light colors only                                      | 3,854                       | 33     | 1.30 (0.91, 1.86)    | 16,921                       | 111    | 0.88 (0.72,1.06)     |
| Dark colors only                                       | 10,973                      | 60     | 0.84 (0.64, 1.10)    | 31,075                       | 221    | 1.00 (0.87, 1.15)    |
| Light and dark colors                                  | 1,060                       | 5      | --                   | 2,805                        | 15     | 0.76 (0.46, 1.26)    |
| <b>Years of personal use</b>                           |                             |        |                      |                              |        |                      |
| None                                                   | 55,149                      | 367    | Ref                  | 214,774                      | 1,656  | Ref                  |
| < 5                                                    | 13,920                      | 76     | 0.84 (0.65,1.07)     | 40,399                       | 279    | 0.92 (0.81,1.04)     |
| 5 or more                                              | 9,074                       | 68     | 1.13 (0.87,1.47)     | 43,311                       | 286    | 0.85 (0.75,0.96)     |
| <b>Applied to others</b>                               |                             |        |                      |                              |        |                      |
| No use†                                                | 75,544                      | 494    | Ref                  | 296,614                      | 2,189  | Ref                  |
| Any use                                                | 3,700                       | 25     | 1.11 (0.74,1.67)     | 8,989                        | 80     | 1.35 (1.08,1.69)     |
| <4 times per year                                      | 3,251                       | 19     | 0.97 (0.61,1.54)     | 7,508                        | 69     | 1.41 (1.10,1.79)     |
| Every 5-8 weeks, 1+ per month                          | 449                         | 6      | 2.11 (0.94,4.73)     | 1,481                        | 11     | 1.07 (0.59,1.94)     |
|                                                        |                             |        | <i>p for trend</i>   |                              |        | 0.3                  |
| <b>Temporary dyes (rinses)</b>                         |                             |        |                      |                              |        |                      |
| <b>Personal use in the 12 months before enrollment</b> |                             |        |                      |                              |        |                      |
| No use                                                 | 73,245                      | 482    | Ref                  | 282,176                      | 2,087  | Ref                  |
| Any use                                                | 6,000                       | 37     | 0.96 (0.68,1.36)     | 23,427                       | 182    | 1.06 (0.91,1.24)     |
| <b>Chemical straighteners</b>                          |                             |        |                      |                              |        |                      |
| <b>Personal use in the 12 months before enrollment</b> |                             |        |                      |                              |        |                      |
| No use†                                                | 68,350                      | 453    | Ref                  | 281,840                      | 2,085  | Ref                  |
| Any use                                                | 10,895                      | 66     | 1.05 (0.75,1.46)     | 23,763                       | 184    | 1.26 (1.02,1.55)     |
| <4 times per year                                      | 4,813                       | 33     | 1.15 (0.77,1.70)     | 11,412                       | 73     | 1.05 (0.80,1.37)     |
| Every 5-8 weeks, 1+ per month                          | 6,082                       | 33     | 0.93 (0.30,1.44)     | 12,351                       | 111    | 1.51 (1.17,1.94)     |
|                                                        |                             |        | <i>p for trend</i>   |                              |        | 0.9                  |
| <b>Applied to others</b>                               |                             |        |                      |                              |        |                      |
| No use†                                                | 75,525                      | 495    | Ref                  | 299,212                      | 2,216  | Ref                  |

|                               |       |    |                    |       |    |                   |
|-------------------------------|-------|----|--------------------|-------|----|-------------------|
| Any use                       | 3,720 | 24 | 1.18 (0.75,1.84)   | 6,391 | 53 | 1.34 (0.99,1.79)  |
| <4 times per year             | 2,675 | 19 | 1.29 (0.79,2.10)   | 4,877 | 42 | 1.39 (1.00,1.92)  |
| Every 5-8 weeks, 1+ per month | 1,045 | 5  | --                 | 1,513 | 11 | 1.16 (0.64, 2.13) |
|                               |       |    | <i>p for trend</i> |       |    | 0.1               |

\*models adjusted for age, race, education, ever oral contraceptive use (OC), parity, age at first birth, smoking status, BMI, age at menarche  
†For hazard ratio estimates associated with personal use in the 12 months before enrollment and application to others in the 12 months before enrollment, “No use” is the referent category for “Any use”. For frequency of use, “No use” is also the referent category for “<4 times per year” and “Every 5 weeks, 1+month” and the p for trend is provided.

Supplement 2: Hair dye and straightener exposures and incident invasive breast cancer by estrogen receptor status, Sister Study 2003-2009.

|                                                        | Person-Years | ER + Invasive Breast Cancer |                    | ER – Invasive Breast Cancer |                   |
|--------------------------------------------------------|--------------|-----------------------------|--------------------|-----------------------------|-------------------|
|                                                        |              | Events                      | A HR (95% CI)      | Events                      | A HR (95% CI)     |
|                                                        |              | 1,600                       |                    | 292                         |                   |
| <b>Permanent hair dye</b>                              |              |                             |                    |                             |                   |
| <b>Personal use in the 12 months before enrollment</b> |              |                             |                    |                             |                   |
| No use <sup>†</sup>                                    | 173,214      | 732                         | Ref                | 121                         | Ref               |
| Any use                                                | 213,126      | 868                         | 1.02 (0.92,1.13)   | 171                         | 1.18 (0.93,1.50)  |
| <4 times per year                                      | 89,932       | 338                         | 1.00 (0.87,1.14)   | 80                          | 1.31 (0.99,1.75)  |
| Every 5-8 weeks, 1+ per month                          | 121,194      | 530                         | 1.04 (0.93,1.16)   | 91                          | 1.08 (0.82,1.43)  |
|                                                        |              |                             | <i>p for trend</i> |                             | 0.5               |
| <b>Dye color</b>                                       |              |                             |                    |                             |                   |
| None                                                   | 173,214      | 732                         | Ref                | 121                         | Ref               |
| Light colors only                                      | 92,847       | 410                         | 1.06 (0.94, 1.20)  | 75                          | 1.19 (0.89, 1.60) |
| Dark colors only                                       | 94,909       | 371                         | 1.01 (0.89, 1.15)  | 78                          | 1.20 (0.90, 1.60) |
| Light and dark colors                                  | 23,010       | 77                          | 0.86 (0.68, 1.09)  | 15                          | 0.99 (0.58, 1.70) |
| <b>Years of personal use</b>                           |              |                             |                    |                             |                   |
| None                                                   | 135,033      | 551                         | Ref                | 93                          | Ref               |
| < 5                                                    | 63,995       | 248                         | 1.06 (0.91,1.23)   | 55                          | 1.27 (0.10,1.78)  |
| 5 or more                                              | 182,209      | 777                         | 1.05 (0.94,1.17)   | 143                         | 1.15 (0.88,1.50)  |
| <b>Applied to others</b>                               |              |                             |                    |                             |                   |
| No use <sup>†</sup>                                    | 357,755      | 1,503                       | Ref                | 265                         | Ref               |
| Any use                                                | 28,585       | 97                          | 0.92 (0.74,1.13)   | 27                          | 1.34 (0.89,2.01)  |
| <4 times per year                                      | 24,013       | 82                          | 0.93 (0.74, 1.17)  | 23                          | 1.37 (0.88,2.12)  |
| Every 5-8 weeks, 1+ per month                          | 4,573        | 15                          | 0.85 (0.51,1.41)   | 4                           | --                |
|                                                        |              |                             | <i>p for trend</i> |                             | 0.4               |
| <b>Semi-permanent dye</b>                              |              |                             |                    |                             |                   |
| <b>Personal use in the 12 months before enrollment</b> |              |                             |                    |                             |                   |
| No use <sup>†</sup>                                    | 315,175      | 1,356                       | Ref                | 235                         | Ref               |
| Any use                                                | 71,166       | 244                         | 0.87 (0.76,1.00)   | 57                          | 1.05 (0.78,1.40)  |
| <4 times per year                                      | 43,033       | 152                         | 0.93 (0.78,1.10)   | 36                          | 1.10 (0.77,1.57)  |
| Every 5-8 weeks, 1+ per month                          | 28,133       | 92                          | 0.78 (0.63, 0.97)  | 21                          | 0.97 (0.62,1.52)  |
|                                                        |              |                             | <i>p for trend</i> |                             | 0.9               |
| <b>Dye color</b>                                       |              |                             |                    |                             |                   |
| None                                                   | 315,175      | 1,356                       | Ref                | 235                         | Ref               |
| Light colors only                                      | 20,860       | 76                          | 0.84 (0.67, 1.06)  | 18                          | 1.16 (0.72, 1.87) |
| Dark colors only                                       | 42,236       | 136                         | 0.85 (0.71, 1.02)  | 32                          | 0.98 (0.67, 1.42) |
| Light and dark colors                                  | 3,869        | 12                          | 0.80 (0.45, 1.42)  | 4                           | --                |
| <b>Years of personal use</b>                           |              |                             |                    |                             |                   |
| None                                                   | 270,994      | 1,188                       | Ref                | 200                         | Ref               |
| < 5                                                    | 54,574       | 182                         | 0.82 (0.70,0.95)   | 46                          | 1.13 (0.82,1.56)  |
| 5 or more                                              | 52,540       | 197                         | 0.87 (0.75,1.01)   | 43                          | 1.07 (0.76,1.49)  |
| <b>Applied to others</b>                               |              |                             |                    |                             |                   |
| No use <sup>†</sup>                                    | 373,616      | 1,544                       | Ref                | 278                         | Ref               |
| Any use                                                | 12,725       | 56                          | 1.27 (0.97,1.67)   | 14                          | 1.52 (0.88,2.62)  |
| <4 times per year                                      | 10,795       | 48                          | 1.30 (0.97,1.74)   | 12                          | 1.53 (0.85,2.75)  |
| Every 5-8 weeks, 1+ per month                          | 1,930        | 8                           | 1.15 (0.57,2.30)   | 2                           | --                |
|                                                        |              |                             | <i>p for trend</i> |                             | 0.1               |
| <b>Temporary dyes (rinses)</b>                         |              |                             |                    |                             |                   |
| <b>Personal use in the 12 months before enrollment</b> |              |                             |                    |                             |                   |
| No use                                                 | 356,835      | 1,480                       | Ref                | 263                         | Ref               |
| Any use                                                | 29,506       | 120                         | 1.09 (0.90,1.32)   | 29                          | 1.24 (0.83,1.84)  |
| <b>Chemical straighteners</b>                          |              |                             |                    |                             |                   |
| <b>Personal use in the 12 months before enrollment</b> |              |                             |                    |                             |                   |
| No use <sup>†</sup>                                    | 351,503      | 1,503                       | Ref                | 260                         | Ref               |
| Any use                                                | 34,837       | 97                          | 0.99 (0.76,1.29)   | 32                          | 1.08 (0.64, 1.82) |
| <4 times per year                                      | 16,279       | 43                          | 0.90 (0.64, 1.25)  | 13                          | 0.98 (0.51,1.87)  |
| Every 5-8 weeks, 1+ per month                          | 18,558       | 54                          | 1.11 (0.80,1.55)   | 19                          | 1.19 (0.64,2.21)  |
|                                                        |              |                             | <i>p for trend</i> |                             | 0.6               |
| <b>Applied to others</b>                               |              |                             |                    |                             |                   |
| No use <sup>†</sup>                                    | 376,149      | 1,574                       | Ref                | 279                         | Ref               |

|                               |        |    |                   |    |                  |
|-------------------------------|--------|----|-------------------|----|------------------|
| Any use                       | 10,192 | 26 | 0.98 (0.65,1.48)  | 13 | 1.65 (0.89,3.08) |
| <4 times per year             | 7,619  | 21 | 1.06 (0.68, 1.66) | 10 | 1.69 (0.85,3.36) |
| Every 5-8 weeks, 1+ per month | 2,573  | 5  | --                | 3  | --               |

\*models adjusted for age, race, education, ever oral contraceptive use (OC), parity, age at first birth, smoking status, BMI, age at menarche  
†For hazard ratio estimates associated with personal use in the 12 months before enrollment and application to others in the 12 months before enrollment, “No use” is the referent category for “Any use”. For frequency of use, “No use” is also the referent category for “<4 times per year” and “Every 5 weeks, 1+month” and the p for trend is provided.
